# Supplementary material for: A new 0D–2D CsPbBr3–Co3O4heterostructure photocatalyst with efficient charge separation for photocatalytic CO2reduction
Source: Royal Society of Chemistry journal article supplement (doi:10.1039/d3qi00527e), 2023-01-01
Supplement: d3qi00527e1.pdf [file d3qi00527e1.pdf]

## **A new 0D-2D CsPbBr<sub>3</sub>-Co<sub>3</sub>O<sub>4</sub> heterostructure photocatalyst with efficient charge separation for photocatalytic CO<sub>2</sub> reduction**

Xin Zhong,<sup>a†</sup> Xinmeng Liang,<sup>a†</sup> Xinyu Lin,<sup>a</sup> Jin Wang,<sup>\*a,b</sup> Malik Zeeshan Shahid,<sup>\*a</sup> and Zhengquan Li,<sup>\*a,b</sup>

<sup>a</sup>Key Laboratory of the Ministry of Education for Advanced Catalysis Materials, Zhejiang Normal University, Jinhua, Zhejiang 321004, P. R. China.

<sup>b</sup>Zhejiang Institute of Optoelectronics, Zhejiang Normal University, Jinhua, Zhejiang 321004, P. R. China.

# The authors contributed equally.

### **Corresponding Author**

\* E-mail: wangjin@zjnu.edu.cn

\* E-mail: zeeshan-nano@zjnu.edu.cn

\* E-mail: zqli@zjnu.edu.cn

## TABLE OF CONTENTS

|                                                      |           |
|------------------------------------------------------|-----------|
| <b>1. EXPERIMENTAL SECTION</b> .....                 | <b>3</b>  |
| <b>1.1 Materials</b> .....                           | <b>3</b>  |
| <b>1.2 Characterization</b> .....                    | <b>3</b>  |
| <b>1.3 Photocatalytic activity measurement</b> ..... | <b>4</b>  |
| <b>1.4 Photoelectrochemical measurements</b> .....   | <b>4</b>  |
| <b>1.5 Energy bandgap calculations</b> .....         | <b>4</b>  |
| <b>2. SUPPLEMENTARY FIGURES S1-13</b> .....          | <b>6</b>  |
| <b>3. SUPPLEMENTARY TABLES S1-3</b> .....            | <b>18</b> |
| <b>4. REFERENCES</b> .....                           | <b>21</b> |

# 1. EXPERIMENTAL SECTION

## 1.1 Materials

All chemicals were purchased and used without further purification. Lead bromide  $\text{PbBr}_2$  (99.999%),  $\text{Cs}_2\text{CO}_3$  (99.995%), oleic acid (OA,  $\text{C}_{18}\text{H}_{34}\text{O}_2$ , 90%), and octadecene (ODE,  $\text{C}_{18}\text{H}_{36}$ , 99.8%), were purchased from Sigma-Aldrich. Hexane (95%), cyclohexamethylenetetramine (Urotropine, 99.5%,  $\text{C}_6\text{H}_{12}\text{N}_4$ ), ethanol, and ethyl acetate (EA, 99.8%) were purchased from Aladdin company. Chloride hexahydrate (99%,  $\text{CoCl}_2 \cdot 6\text{H}_2\text{O}$ ) was purchased from Sinopharm chemical reagent. The water used for the experiments was purified by a Millipore Milli-Q system.

## 1.2 Characterization

Transmission electron microscopy (TEM), high-resolution TEM (HRTEM), high-angle annular dark-field scanning transmission electron microscopy (HAADF-STEM), and energy-dispersive X-ray spectroscopy (EDS) were measured by employing a JEOL JEM-2100F field-emission high-resolution transmission electron microscope operated at 200 kV. The samples were prepared by using EA solution, and a piece of the carbon-coated copper grid was used on which a drop of suspension (of each sample) was precisely placed. The copper grid was dried under ambient conditions and further used for morphological characterization. Zeta sizer Nano-ZS (Malvern Instruments, U.K.) was used to collect Zeta ( $\zeta$ )-potential data, for which the samples were prepared by dispersing in EA solutions. Philips X'Pert Pro Super X-ray diffractometer with Cu-K $\alpha$  radiation ( $\lambda = 1.5418\text{\AA}$ ) was used to record Powder XRD patterns. Shimadzu 2501PC UV-vis spectrophotometer was employed to investigate the UV-vis absorption spectra. FluoroMax-4 spectrofluorometer (HoribaScientific) and analyzed with an Origin-integrated software (FluoroEssencev2.2) was used to measure the steady-state photoluminescence (PL) spectra. The PL decay spectra were recorded on a photoluminescence spectrometer (FLS980, Edinburgh Instruments Ltd.) with a 380-nm excitation wavelength and a 515-nm emission wavelength with the time-correlated single-photon counting (TCSPC) mode. The lifetime data were analyzed with DataStation v6.6 (Horiba Scientific). ESCALab 250 X-ray photoelectron spectrometer with Al-K $\alpha$  radiation was used to record X-ray photoelectron spectra (XPS) data in which the calibration was done with C 1s peak at 284.6 eV.

### 1.3 Photocatalytic activity measurement

In a typical experiment, the as-prepared photocatalysts (5 mg) were first added to a Pyrex photoreactor without using any sacrificial agent. Next, 50  $\mu\text{L}$  of water was added. Then, a rubber septum was used to seal the photoreactor, and then it was vacuumed and subsequently purged with  $\text{CO}_2$  for 10~20 min in the dark. The photoreactor was then placed in a water bath maintained at 25  $^\circ\text{C}$ , stirred, and irradiated by a 300-W Xe lamp with a 400 nm cutoff filter (Solaredge 700, 100  $\text{mW}\cdot\text{cm}^{-2}$ ). The product distribution was quantified through periodic headspace gas analysis (500  $\mu\text{L}$ ) by gas chromatography (GC, 7820A, Ar carrier, Agilent). Produced  $\text{CH}_4$  was measured by a flame ionization detector (FID), and CO was converted to  $\text{CH}_4$  by a methanation reactor and then analyzed by the FID. The isotope-labelled experiments were performed using  $^{13}\text{CO}_2$  instead of  $^{12}\text{CO}_2$ , and the products were analyzed using gas chromatography-mass spectrometry (GC-MS, 7890A and 5975C, Agilent). The products were separated with GC in advance and reached the MS at different retention times.

### 1.4 Photoelectrochemical measurements

The Photoelectrochemical measurements were carried out using a three-electrode cell CHI 760E electrochemical station (Shanghai Chenhua, China) with a Pt foil counter electrode and a saturated Ag/AgCl reference electrode. The working electrode was prepared by the dip-coating method. About 1 mg of the photocatalyst was dispersed in 1 mL of hexane and 10  $\mu\text{L}$  Nafion solution to form a slurry. Next, 30  $\mu\text{L}$  of the slurry was dip-coated on the FTO conductive glass with an exposure area of 0.196  $\text{cm}^2$ . Subsequently, the film was dried in a vacuum oven at 80  $^\circ\text{C}$ . Then acetonitrile solution with 0.1 mol/L of tetrabutylammonium hexafluorophosphate ( $\text{TBAPF}_6$ ) was used as the electrolyte. The variation of photoinduced current density versus time (I-t curve) was recorded at a 0 V bias potential under visible light switching on and off mode,  $\lambda > 400$  nm, 300 W Xe lamp (Solaredge 700). The electrochemical impedance spectroscopy (EIS) results were obtained at the open circuit potential using a frequency ranging from  $10^4$  Hz to  $10^{-1}$  Hz.

### 1.5 Energy bandgap calculations

In relational expression proposed by Tauc, Devis, and Mott i.e.,  $\alpha h\nu = A (h\nu - E_g)^n$  symbols are denoted as follows; h: plank constant,  $\nu$ : frequency of vibration,  $\alpha$ : absorption coefficient,  $E_g$ : band gap, and A: proportional constant. As both constituents i.e.,  $\text{CsPbBr}_3$  QDs and  $\text{Co}_3\text{O}_4$  HPs

in heterostructure are direct allowed transition, the calculation of energy bandgap value was based on  $n=1/2$ .

## 2. SUPPLEMENTARY FIGURES S1-13

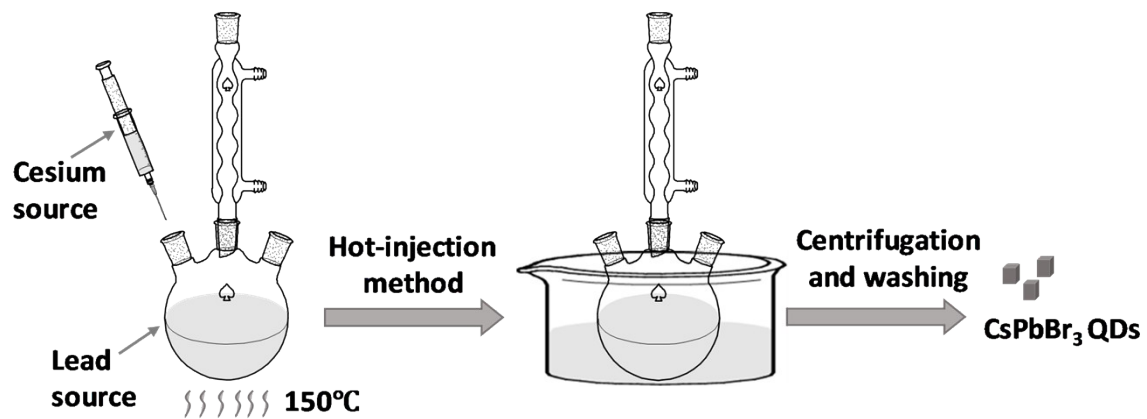

**Fig. S1** Schematic illustration for the synthesis of CsPbBr<sub>3</sub> QDs via hot-injection method.

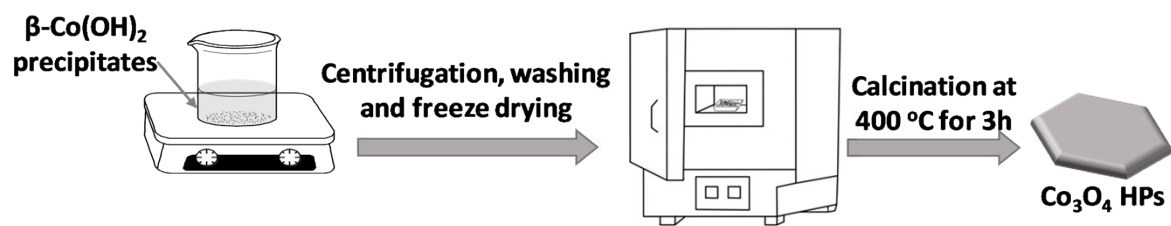

**Fig. S2** Schematic illustration for the synthesis of  $\text{Co}_3\text{O}_4$  HPs by calcination route.

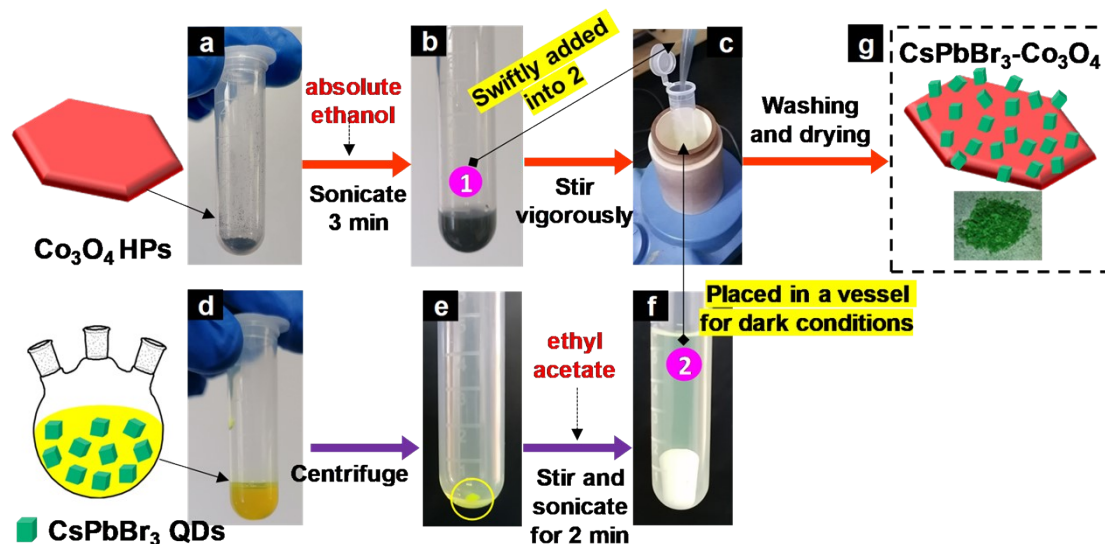

**Fig. S3** Illustration for the synthesis OD/2D CsPbBr<sub>3</sub>-Co<sub>3</sub>O<sub>4</sub> heterostructure at ambient conditions, indicating stepwise processes and their real-time photographs.

The desired quantity of Co<sub>3</sub>O<sub>4</sub> HPs was taken (Fig. S3a) and dissolved in absolute ethanol via sonication for 3 minutes (Fig. S3b) to get suspension 1. On the other hand, the required amount of CsPbBr<sub>3</sub> QDs was taken from stock (Fig. S3d), centrifuged (Fig. S3e), and dispersed in ethyl acetate via stirring and sonication for 2 minutes to obtain the suspension 2 (Fig. S3f). This suspension 2 was then placed in the Teflon lined vessel for the subsequent procedure to occur in the dark (Fig. 1c). Next, suspension 1 was swiftly inserted into suspension 2 under vigorous stirring (Fig. 1c), and later on, covered with another Teflon lined vessel directed upside down to achieve a dark environment. The stirring continued for 30 minutes in dark and another 30 minutes in ambient conditions and finally, after washing and drying, the CsPbBr<sub>3</sub>-Co<sub>3</sub>O<sub>4</sub> heterostructure was obtained (Fig. S3g).



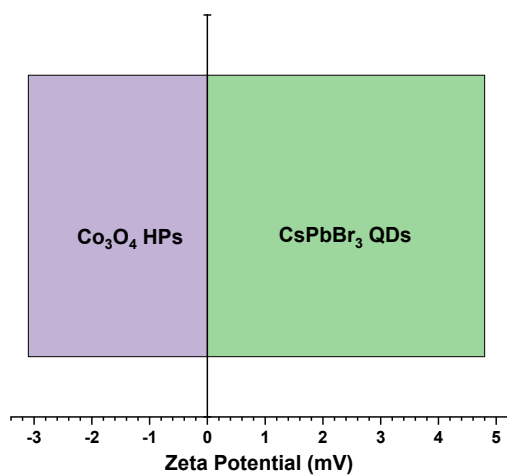

**Fig. S4** Zeta potential of pristine Co<sub>3</sub>O<sub>4</sub> HPs and CsPbBr<sub>3</sub> QDs in the solution of ethyl acetate. The values endorsing the successful coulomb electrostatic interaction between these components to form the Co<sub>3</sub>O<sub>4</sub>-CsPbBr<sub>3</sub> heterojunction.

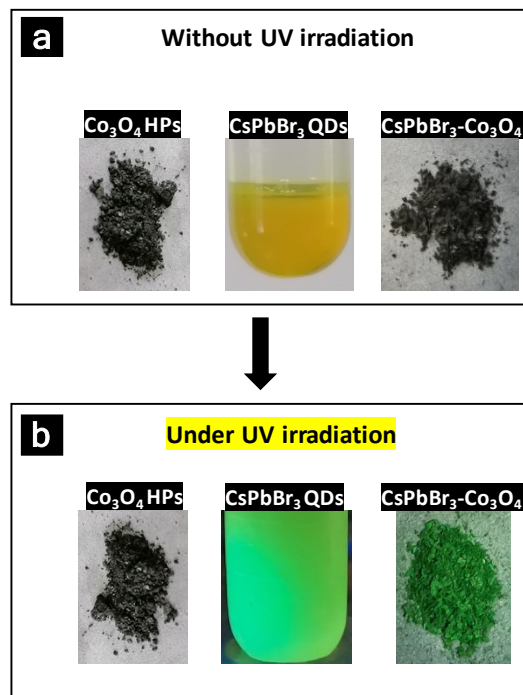

**Fig. S5** Color transformations of as-prepared samples (a) without UV light irradiation and (b) under UV light illumination.

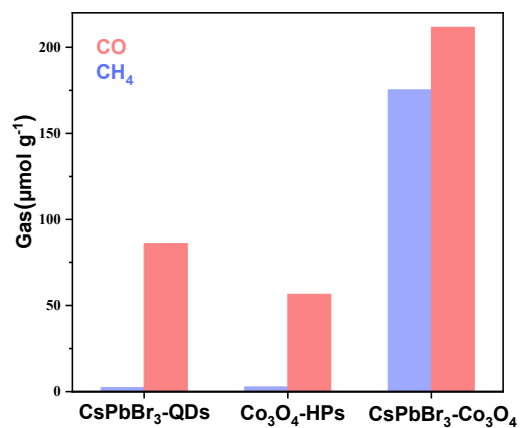

**Fig. S6** Comparative depiction of catalytic activity during 6 hours in terms of produced gas CO and CH<sub>4</sub> by using as-synthesized CsPbBr<sub>3</sub> QDs, Co<sub>3</sub>O<sub>4</sub> HPs, and CsPbBr<sub>3</sub>-Co<sub>3</sub>O<sub>4</sub> heterostructure.

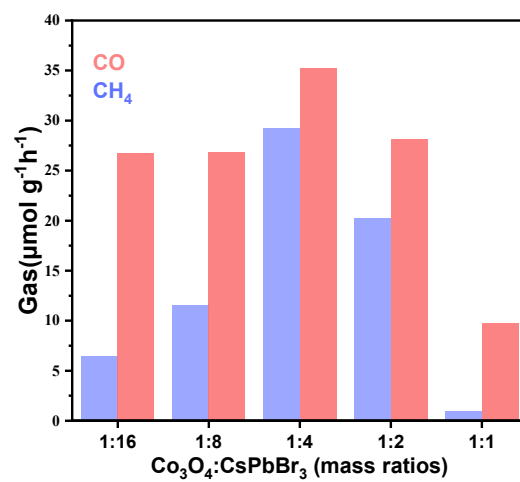

**Fig. S7** Influence of various mass ratios in the CsPbBr<sub>3</sub>-Co<sub>3</sub>O<sub>4</sub> heterostructure over the production of CO and CH<sub>4</sub>.

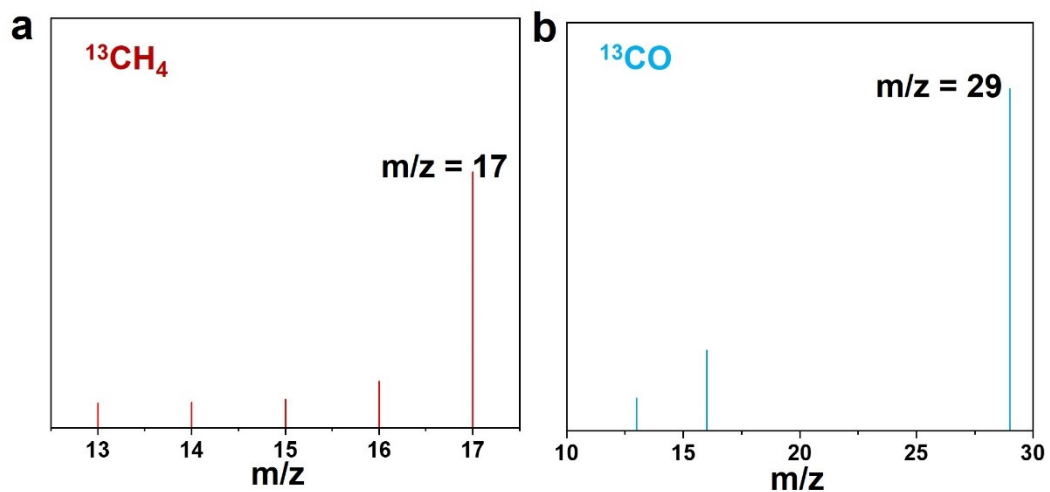

**Fig. S8** Mass spectra showing (a)  $^{13}\text{CH}_4$  ( $m/z = 17$ ) and (b)  $^{13}\text{CO}$  ( $m/z = 29$ ) generated over  $\text{CsPbBr}_3\text{-Co}_3\text{O}_4$  in the photocatalytic  $^{13}\text{CO}_2$  reduction.

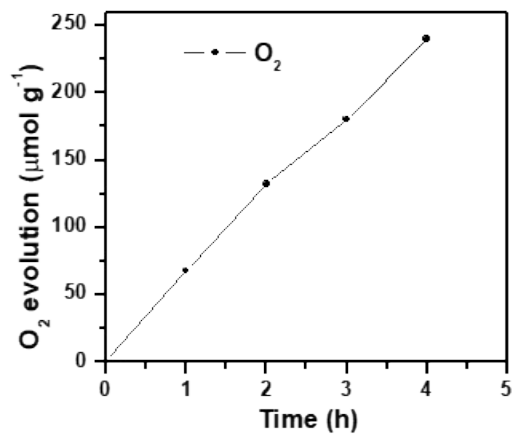

**Fig. S9** The results confirm the oxidation of water to oxygen during the photocatalytic reduction of  $CO_2$ .

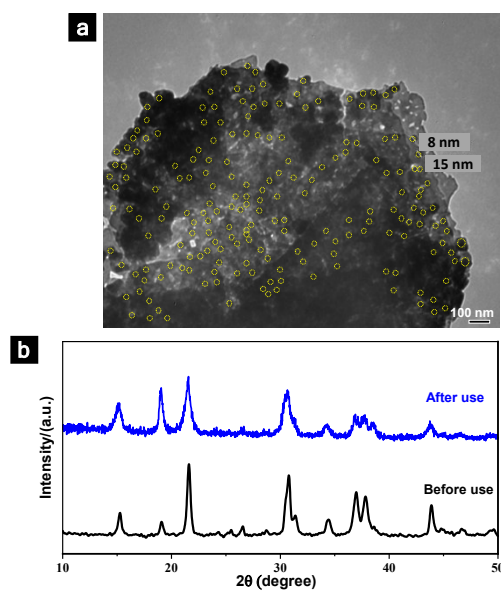

**Fig. S10** TEM image and XRD pattern of  $\text{CsPbBr}_3\text{-Co}_3\text{O}_4$  after 5 consecutive cycles, displaying the stability of both morphology and crystallinity, beneficial for practical applications.

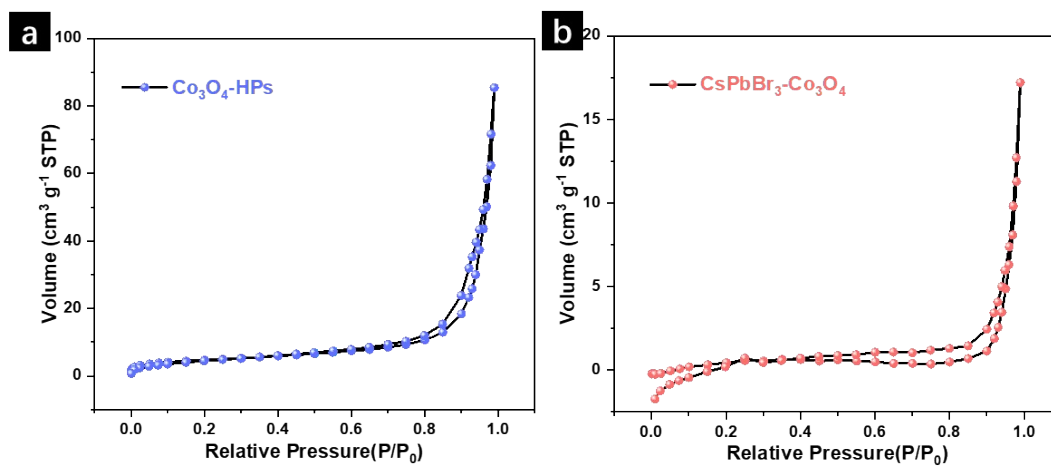

**Fig. S11** Nitrogen adsorption-desorption curves for (e) pristine  $\text{Co}_3\text{O}_4$  HPs and (f)  $\text{Co}_3\text{O}_4$  HPs decorated with  $\text{CsPbBr}_3$ -QDs, and their corresponding Brunauer-Emmett-Teller BET surface area values are mentioned in Table S1.



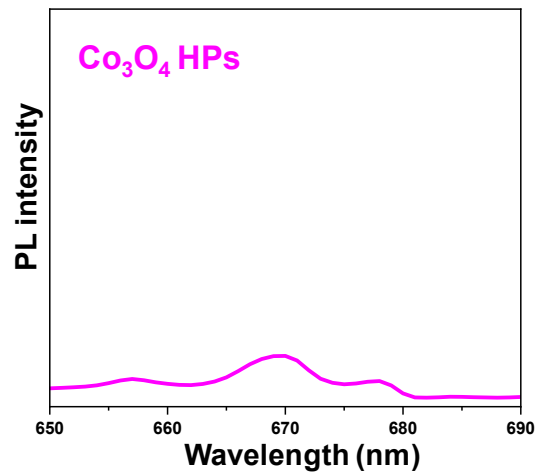

**Fig. S12** Control experiments showing steady-state photoluminescence spectra of  $\text{Co}_3\text{O}_4$  HPs.

Under an excitation wavelength at about 630 nm, a weak PL signal was obtained. The peak at 670 nm was probably ascribed to deep-level emission in  $\text{Co}_3\text{O}_4$ . Note that the as-prepared  $\text{Co}_3\text{O}_4$  sample did not display the signals for TRPL.

### 3. SUPPLEMENTARY TABLES S1-3

**Table S1.** The photocatalytic activity of various state-of-the-art photocatalysts in comparison with as-prepared CsPbBr<sub>3</sub>-Co<sub>3</sub>O<sub>4</sub> heterostructure

| Entry# | Photocatalyst                                                  | CO                                   | CH <sub>4</sub> | *R <sub>electron</sub> | Reference |
|--------|----------------------------------------------------------------|--------------------------------------|-----------------|------------------------|-----------|
|        |                                                                | μmol g <sup>-1</sup> h <sup>-1</sup> |                 |                        |           |
| 1      | CsPbBr <sub>3</sub> -Co <sub>3</sub> O <sub>4</sub>            | 35.40                                | 29.2            | 304.4                  | This work |
| 2      | CsPbBr <sub>3</sub> QDs                                        | 14.23                                | 0.39            | 31.98                  | This work |
| 4      | CsPbBr <sub>3</sub> -BiOBr                                     | 2.5                                  | 26.1            | 213.8                  | [1]       |
| 5      | BiVO <sub>4</sub> /CsPbBr <sub>3</sub>                         | 17                                   | 6               | 82                     | [2]       |
| 6      | Mn-CsPbBr <sub>3</sub>                                         | 7.5                                  | 0.58            | 19.64                  | [3]       |
| 7      | ZnSe-CsSnCl <sub>3</sub>                                       | 57                                   | 2               | 128.32                 | [4]       |
| 8      | CsPbBr <sub>3</sub> /CTF-1                                     | 48.2                                 | 0               | 96.4                   | [5]       |
| 9      | OD CsPbBr <sub>3</sub> /2D CsPb <sub>2</sub> Br <sub>5</sub>   | 197.11                               | 1.5             | 406.22                 | [6]       |
| 10     | CsPbBr <sub>3</sub> /Bi <sub>2</sub> WO <sub>6</sub>           | 50.3                                 | 1               | 108.6                  | [7]       |
| 11     | CsPbBr <sub>3</sub> /Bi <sub>2</sub> WO <sub>6</sub>           | 9.3                                  | 14.3            | 133                    | [8]       |
| 12     | CsPbBr <sub>3</sub> /UiO-66(NH <sub>2</sub> )                  | 8.21                                 | 0.26            | 18.5                   | [9]       |
| 13     | CsPbBr <sub>3</sub> QDs                                        | 4.125                                | 1.90            | 23.72                  | [10]      |
| 14     | CsPbBr <sub>3</sub> /GO                                        | 4.81                                 | 2.46            | 29.32                  | [10]      |
| 15     | Co <sub>3</sub> O <sub>4</sub> (OVs)                           | 51.7                                 | 0               | 103.4                  | [11]      |
| 16     | Co <sub>3</sub> O <sub>4</sub> /Al <sub>2</sub> O <sub>3</sub> | 48.4                                 | 0               | 96.8                   | [12]      |
| 17     | Hollow Co <sub>3</sub> O <sub>4</sub> Dodecahedron             | 46.3                                 | 0               | 92.6                   | [13]      |
| 18     | Co <sub>3</sub> O <sub>4</sub> nanoparticles                   | 0.73                                 | 10              | 81.48                  | [14]      |

\*Formula used to calculate the rate of electron consumed:  $R_{\text{electron}} = 2R_{\text{CO}} + 8R_{\text{CH}_4}$   
Where  $R_{\text{CO}}$  is the rate of CO evolution, and  $R_{\text{CH}_4}$  is the rate of CH<sub>4</sub> evolution

**Table S2.** The information of nitrogen adsorption-desorption analysis in terms of BET surface area, average pore size, and total pore volume of as-synthesized  $\text{Co}_3\text{O}_4$ -HPs and  $\text{CsPbBr}_3$ - $\text{Co}_3\text{O}_4$ .

| <b>Samples</b>                              | <b>BET surface area</b>                   | <b>average pore size</b> | <b>total pore volume</b>                   |
|---------------------------------------------|-------------------------------------------|--------------------------|--------------------------------------------|
|                                             | <b>(<math>\text{m}^2/\text{g}</math>)</b> | <b>(nm)</b>              | <b>(<math>\text{cm}^3/\text{g}</math>)</b> |
| $\text{Co}_3\text{O}_4$ HPs                 | 16.902                                    | 31.35                    | 0.1325                                     |
| $\text{CsPbBr}_3$ - $\text{Co}_3\text{O}_4$ | 5.016                                     | 21.21                    | 0.0266                                     |

**Table S3.** PL decay parameters of the CsPbBr<sub>3</sub> QDs in comparison with CsPbBr<sub>3</sub>-Co<sub>3</sub>O<sub>4</sub> heterostructure.

| Sample                                                                                                           | $\tau_1$ | A <sub>1</sub> | $\tau_2$ | A <sub>2</sub> | $\tau_3$ | A <sub>3</sub> | $\tau_{avg}$ |
|------------------------------------------------------------------------------------------------------------------|----------|----------------|----------|----------------|----------|----------------|--------------|
| CsPbBr <sub>3</sub> -QDs                                                                                         | 2.61     | 72.9%          | 14.71    | 23.7%          | 104.36   | 3.4%           | 47.43        |
| CsPbBr <sub>3</sub> -Co <sub>3</sub> O <sub>4</sub>                                                              | 3.38     | 7.5%           | 18.21    | 84.2%          | 103.52   | 8.3%           | 45.04        |
| *Determined using the fitting function $y = B + A_1 \exp(-t/\tau_1) + A_2 \exp(-t/\tau_2) + A_3 \exp(-t/\tau_3)$ |          |                |          |                |          |                |              |

## 4. REFERENCES

- 1 Z. Zhang, L. Li, Y. Jiang and J. Xu, Step-scheme photocatalyst of CsPbBr<sub>3</sub> quantum Dots/BiOBr nanosheets for efficient CO<sub>2</sub> photoreduction, *Inorg.chem.*, 2022, **61**, 3351-3360.
- 2 X. Y. Yue, L. Cheng, J. J. Fan and Q. J. Xiang, 2D/2D BiVO<sub>4</sub>/CsPbBr<sub>3</sub> S-scheme heterojunction for photocatalytic CO<sub>2</sub> reduction: Insights into structure regulation and Fermi level modulation, *Appl. Catal. Environ.*, 2022, **304**, 120979.
- 3 C. C. Lin, T. R. Liu, S. R. Lin, K. M. Boopathi, C. H. Chiang, W. Y. Tzeng, W. C. Chien, H. S. Hsu, C. W. Luo, H. Y. Tsai, H. A. Chen, P. C. Kuo, J. Shiue, J. W. Chiou, W. F. Pong, C. C. Chen and C. W. Chen, Spin-polarized photocatalytic CO<sub>2</sub> reduction of Mn-doped perovskite nanoplates, *J. Am. Chem. Soc.*, 2022, **144**, 15718-15726.
- 4 N. Li, X. Chen, J. Wang, X. Liang, L. Ma, X. Jing, D. L. Chen and Z. Li, ZnSe Nanorods-CsSnCl<sub>3</sub> perovskite heterojunction composite for photocatalytic CO<sub>2</sub> reduction, *ACS nano*, 2022, **16**, 3332-3340.
- 5 Q. Wang, J. Wang, J. C. Wang, X. Hu, Y. Bai, X. Zhong and Z. Li, Coupling CsPbBr<sub>3</sub> quantum dots with covalent triazine frameworks for visible-light-driven CO<sub>2</sub> reduction, *ChemSusChem*, 2021, **14**, 1131-1139.
- 6 L. Ding, B. Borjigin, Y. Li, X. Yang, X. Wang and H. Li, Assembling an affinal OD CsPbBr<sub>3</sub>/2D CsPb<sub>2</sub>Br<sub>5</sub> architecture by synchronously in situ growing CsPbBr<sub>3</sub> QDs and CsPb<sub>2</sub>Br<sub>5</sub> nanosheets: enhanced activity and reusability for photocatalytic CO<sub>2</sub> reduction, *ACS applied mater. interfaces*, 2021, **13**, 51161-51173.
- 7 J. Wang, J. Wang, N. Li, X. Du, J. Ma, C. He and Z. Li, Direct Z-scheme OD/2D heterojunction of CsPbBr<sub>3</sub> quantum Dots/Bi<sub>2</sub>WO<sub>6</sub> nanosheets for efficient photocatalytic CO<sub>2</sub> reduction, *ACS Appl. Mater. Interfaces*, 2020, **12**, 31477-31485.
- 8 Y. Jiang, H. Y. Chen, J. Y. Li, J. F. Liao, H. H. Zhang, X. D. Wang and D. B. Kuang, Z-Scheme 2D/2D heterojunction of CsPbBr<sub>3</sub>/Bi<sub>2</sub>WO<sub>6</sub> for improved photocatalytic CO<sub>2</sub> reduction, *Adv. Func. Mater.*, 2020, **30**, 2004293.
- 9 S. Wan, M. Ou, Q. Zhong and X. Wang, Perovskite-type CsPbBr<sub>3</sub> quantum dots/UiO-66(NH<sub>2</sub>) nano junction as efficient visible-light-driven photocatalyst for CO<sub>2</sub> reduction, *Chem. Eng. J.*, 2019, **358**, 1287-1295.
- 10 Y. F. Xu, M. Z. Yang, B. X. Chen, X. D. Wang, H. Y. Chen, D. B. Kuang and C. Y. Su, A CsPbBr<sub>3</sub> perovskite quantum dot/graphene oxide composite for photocatalytic CO<sub>2</sub> reduction, *J. Am. Chem. Soc.*, 2017, **139**, 5660-5663.
- 11 Q. Zhang, P. Yang, H. Zhang, J. Zhao, H. Shi, Y. Huang and H. Yang, Oxygen vacancies in Co<sub>3</sub>O<sub>4</sub> promote CO<sub>2</sub> photoreduction, *Appl. Catal. Environ.*, 2022, **300**, 120729.
- 12 P. Yang, Q. Zhang, Z. Yi, J. Wang and H. Yang, Rational electronic control of carbon dioxide reduction over cobalt oxide, *J. Catalysis*, 2020, **387**, 119-128.
- 13 L. Wang, J. Wan, Y. Zhao, N. Yang and D. Wang, Hollow multi-shelled structures of Co<sub>3</sub>O<sub>4</sub> dodecahedron with unique crystal orientation for enhanced photocatalytic CO<sub>2</sub> reduction, *J. Am. Chem. Soc.*, 2019, **141**, 2238-2241.
- 14 J. Y. Choi, C. K. Lim, B. Park, M. Kim, A. Jamal and H. Song, Surface activation of cobalt oxide nanoparticles for photocatalytic carbon dioxide reduction to methane, *J. Mater. Chem.*, 2019, **7**, 15068-15072.
